# Supplementary material
Source: PubMed Central journal article supplement (PMC6563569)
Supplement: jamaneurol-76-650-s001.pdf [file jamaneurol-76-650-s001.pdf]

## Supplementary Online Content

Gardiner SL, Boogaard MW, Trompet S, et al. Prevalence of carriers of intermediate and pathological polyglutamine disease–associated alleles among large population-based cohorts. *JAMA Neurol*. Published online April 1, 2019. doi:10.1001/jamaneurol.2019.0423

**eTable 1.** Polyglutamine disease-associated genes and primers.

**eTable 2.** Summary of polyglutamine disease-associated genes over the cohorts.

**eTable 3.** Differences in characteristics between individuals with CAG repeat numbers within the pathological range and individuals with CAG repeat numbers within the normal range.

**eFigure.** The distribution of the CAG repeat numbers in the polyglutamine disease-associated genes per allele and cohort.

This supplementary material has been provided by the authors to give readers additional information about their work.

**eTable 1. Polyglutamine disease-associated genes and primers.**

| Gene           | Primer 1 (forward)             | Primer 2 (reverse)              | Mix |
|----------------|--------------------------------|---------------------------------|-----|
| <i>ATXN1</i>   | CCCCAACCGCCAACCCC              | GTGGGATCATCGTCTGGTGGG           | A   |
| <i>ATXN2</i>   | CGTTCCGGCGTCTCCTTGG            | ACCGAGGAGGGAGCCGT               | B   |
| <i>ATXN3</i>   | GTAATCTGTATCAGACTAACTGCTCTTG   | GGAATGAAGAATAATGTAAAGCAAAAATCAC | B   |
| <i>CACNA1A</i> | CGTGCCTATTCCCCTGTGATCC         | CCTGGGTACCTCCGAGG               | A   |
| <i>ATXN7</i>   | GAACTCCCTGGCGCCTCC             | GATTCCACGACTGTCCCAGCAT          | A   |
| <i>TBP</i>     | CCACAGCCTATTCAGAACACC          | TGGGACGTTGACTGCTGAAC            | B   |
| <i>HTT</i>     | ATGAAGGCCTTCGAGTCCCTCAAGTCCTTC | GGCGGTGGCGGCTGTTGCTGCTGC        | A   |
| <i>ATN1</i>    | CCACCCACCAGTCTCAACACATC        | CCAGTGGGTGGGAAATGCTC            | A   |
| <i>AR</i>      | ACCGAGGAGCTTTCCAGAAT           | CTCATCCAGGACCAGGTAGC            | B   |

**eTable 2. Summary of polyglutamine disease-associated genes over the cohorts.**

| <b>PDAG</b>    | <b>Cohort</b>  | <b>Allele</b> | <b>Mean</b> | <b>Median</b> | <b>Range</b> | <b>#Total</b> |
|----------------|----------------|---------------|-------------|---------------|--------------|---------------|
| <b>ATXN1</b>   | NESDA          | short         | 29.2        | 29            | 19-35        | 930           |
|                |                | long          | 30.8        | 30            | 27-37        | 930           |
|                | NESDO          | short         | 29.2        | 29            | 26-34        | 128           |
|                |                | long          | 30.9        | 30            | 28-39        | 128           |
|                | NEO            | short         | 29.2        | 29            | 17-36        | 6438          |
|                |                | long          | 30.8        | 30            | 22-40        | 6438          |
|                | PROSPER        | short         | 29.2        | 29            | 17-36        | 5633          |
|                |                | long          | 30.8        | 30            | 26-44        | 5633          |
|                | Leiden 85-plus | short         | 29.3        | 29            | 24-35        | 539           |
|                |                | long          | 30.8        | 30            | 28-38        | 539           |
|                | <b>Total</b>   | short         | 29.2        | 29            | 17-36        | 13668         |
|                |                | long          | 30.8        | 30            | 22-44        | 13668         |
| <b>ATXN2</b>   | NESDA          | short         | 21.9        | 22            | 13-23        | 930           |
|                |                | long          | 22.3        | 22            | 22-31        | 930           |
|                | NESDO          | short         | 21.9        | 22            | 17-22        | 128           |
|                |                | long          | 22.4        | 22            | 22-30        | 128           |
|                | NEO            | short         | 21.9        | 22            | 13-30        | 6389          |
|                |                | long          | 22.4        | 22            | 17-36        | 6389          |
|                | PROSPER        | short         | 21.9        | 22            | 11-27        | 5548          |
|                |                | long          | 22.4        | 22            | 22-33        | 5548          |
|                | Leiden 85-plus | short         | 21.9        | 22            | 13-23        | 541           |
|                |                | long          | 22.4        | 22            | 22-31        | 541           |
|                | <b>Total</b>   | short         | 21.9        | 22            | 11-30        | 13536         |
|                |                | long          | 22.4        | 22            | 17-36        | 13536         |
| <b>ATXN3</b>   | NESDA          | short         | 18.8        | 20            | 13-28        | 929           |
|                |                | long          | 24.1        | 23            | 13-38        | 929           |
|                | NESDO          | short         | 18.8        | 20            | 14-27        | 128           |
|                |                | long          | 25.0        | 25.5          | 14-31        | 128           |
|                | NEO            | short         | 19.0        | 20            | 14-35        | 6494          |
|                |                | long          | 24.2        | 23            | 14-62        | 6494          |
|                | PROSPER        | short         | 19.0        | 20            | 14-34        | 5544          |
|                |                | long          | 24.3        | 23            | 14-49        | 5543          |
|                | Leiden 85-plus | short         | 18.9        | 20            | 14-28        | 450           |
|                |                | long          | 24.4        | 24            | 14-38        | 450           |
|                | <b>Total</b>   | short         | 19.0        | 20            | 13-35        | 13545         |
|                |                | long          | 24.2        | 23            | 13-62        | 13544         |
| <b>CACNA1A</b> | NESDA          | short         | 10.5        | 11            | 4-13         | 927           |
|                |                | long          | 12.5        | 13            | 4-15         | 927           |
|                | NESDO          | short         | 10.7        | 11            | 4-14         | 128           |
|                |                | long          | 12.3        | 13            | 4-14         | 128           |
|                | NEO            | short         | 10.5        | 11            | 4-14         | 6394          |
|                |                | long          | 12.5        | 13            | 4-22         | 6394          |
|                | PROSPER        | short         | 10.6        | 11            | 4-14         | 5633          |
|                |                | long          | 12.5        | 13            | 7-17         | 5633          |
|                | Leiden 85-plus | short         | 10.7        | 11            | 4-14         | 533           |
|                |                | long          | 12.5        | 13            | 7-19         | 532           |
|                | <b>Total</b>   | short         | 10.6        | 11            | 4-14         | 13615         |
|                |                | long          | 12.5        | 13            | 4-22         | 13614         |

| PDAG  | Cohort         | Allele | Mean | Median | Range | #Total |
|-------|----------------|--------|------|--------|-------|--------|
| ATXN7 | NESDA          | short  | 10.0 | 10     | 7-15  | 856    |
|       |                | long   | 10.8 | 10     | 9-17  | 856    |
|       | NESDO          | short  | 10.0 | 10     | 7-13  | 125    |
|       |                | long   | 10.9 | 10     | 10-14 | 125    |
|       | NEO            | short  | 10.0 | 10     | 5-13  | 6356   |
|       |                | long   | 10.8 | 10     | 7-30  | 6356   |
|       | PROSPER        | short  | 10.1 | 10     | 7-16  | 5285   |
|       |                | long   | 10.8 | 10     | 10-25 | 5285   |
|       | Leiden 85-plus | short  | 10.1 | 10     | 7-14  | 413    |
|       |                | long   | 10.9 | 10     | 10-25 | 413    |
|       | <b>Total</b>   | short  | 10.1 | 10     | 5-16  | 13035  |
|       |                | long   | 10.8 | 10     | 7-30  | 13035  |
| TBP   | NESDA          | short  | 36.4 | 37     | 27-39 | 930    |
|       |                | long   | 37.9 | 38     | 33-43 | 930    |
|       | NESDO          | short  | 36.1 | 36     | 29-38 | 128    |
|       |                | long   | 37.8 | 38     | 35-41 | 128    |
|       | NEO            | short  | 36.4 | 37     | 23-40 | 6418   |
|       |                | long   | 37.9 | 38     | 30-45 | 6418   |
|       | PROSPER        | short  | 36.3 | 37     | 26-40 | 5559   |
|       |                | long   | 37.9 | 38     | 30-47 | 5559   |
|       | Leiden 85-plus | short  | 36.3 | 37     | 27-39 | 550    |
|       |                | long   | 37.9 | 38     | 35-44 | 550    |
|       | <b>Total</b>   | short  | 36.3 | 37     | 23-40 | 13585  |
|       |                | long   | 37.9 | 38     | 30-47 | 13585  |
| HTT   | NESDA          | short  | 16.9 | 17     | 9-26  | 930    |
|       |                | long   | 20.0 | 19     | 15-33 | 930    |
|       | NESDO          | short  | 16.9 | 17     | 10-24 | 128    |
|       |                | long   | 19.8 | 19     | 15-30 | 128    |
|       | NEO            | short  | 16.9 | 17     | 6-31  | 6453   |
|       |                | long   | 20.1 | 19     | 11-40 | 6453   |
|       | PROSPER        | short  | 16.9 | 17     | 9-29  | 5602   |
|       |                | long   | 20.2 | 19     | 10-38 | 5602   |
|       | Leiden 85-plus | short  | 17.0 | 17     | 9-25  | 557    |
|       |                | long   | 20.3 | 19     | 15-33 | 557    |
|       | <b>Total</b>   | short  | 16.9 | 17     | 6-31  | 13670  |
|       |                | long   | 20.2 | 19     | 10-40 | 13670  |
| ATN1  | NESDA          | short  | 12.3 | 14     | 7-19  | 931    |
|       |                | long   | 15.5 | 15     | 8-27  | 931    |
|       | NESDO          | short  | 12.6 | 15     | 8-18  | 128    |
|       |                | long   | 15.6 | 16     | 8-21  | 128    |
|       | NEO            | short  | 12.4 | 14     | 3-22  | 6467   |
|       |                | long   | 15.5 | 15     | 8-28  | 6467   |
|       | PROSPER        | short  | 12.3 | 14     | 5-20  | 5633   |
|       |                | long   | 15.6 | 16     | 8-27  | 5633   |
|       | Leiden 85-plus | short  | 12.2 | 14     | 5-17  | 550    |
|       |                | long   | 15.5 | 16     | 8-25  | 550    |
|       | <b>Total</b>   | short  | 12.4 | 14     | 3-22  | 13709  |
|       |                | long   | 15.5 | 15     | 8-28  | 13709  |

| PDAG         | Cohort         | Allele       | Mean | Median | Range | #Total |
|--------------|----------------|--------------|------|--------|-------|--------|
| AR           | NESDA          | allele male  | 22.0 | 22     | 13-32 | 335    |
|              |                | short female | 20.2 | 20     | 8-27  | 590    |
|              |                | long female  | 23.4 | 23     | 17-33 | 590    |
|              | NESDO          | allele male  | 21.5 | 21     | 18-27 | 4978   |
|              |                | short female | 20.2 | 20     | 15-25 | 78     |
|              |                | long female  | 22.8 | 22.5   | 19-32 | 78     |
|              | NEO            | allele male  | 22.0 | 22     | 11-36 | 3010   |
|              |                | short female | 20.3 | 20     | 8-29  | 3330   |
|              |                | long female  | 23.4 | 24     | 16-38 | 3330   |
|              | PROSPER        | allele male  | 22.0 | 22     | 7-35  | 2663   |
|              |                | short female | 20.4 | 20     | 7-29  | 2847   |
|              |                | long female  | 23.6 | 23     | 16-39 | 2847   |
|              | Leiden 85-plus | allele male  | 22.4 | 22     | 12-32 | 179    |
|              |                | short female | 20.4 | 20     | 11-30 | 369    |
|              |                | long female  | 23.5 | 24     | 16-36 | 369    |
| <b>Total</b> | allele male    | 22.0         | 22   | 7-36   | 6236  |        |
|              | short female   | 20.3         | 20   | 7-30   | 7214  |        |
|              | long female    | 23.5         | 23   | 16-39  | 7214  |        |

PDAG=polyglutamine disease-associated gene. NESDA=the Netherlands Study of Depression and Anxiety. NESDO=the Netherlands Study of Depression in Older Persons. NEO=the Netherlands Epidemiology of Obesity. PROSPER=the Prospective Study of Pravastatin in the Elderly at Risk.

**eTable 3. Differences in characteristics between individuals with CAG repeat numbers within the pathological range and individuals with CAG repeat numbers within the normal range.**

| PDAG     | Variable    |                 | Pathological (%) | Normal <sup>a</sup> | Total     | P-value <sup>b</sup> |      |
|----------|-------------|-----------------|------------------|---------------------|-----------|----------------------|------|
| ATXN1    | Cohort (n)  | NESDA           | 0 (0.00)         | 930                 | 930       | .027                 |      |
|          |             | NESDO           | 1 (0.78)         | 127                 | 128       |                      |      |
|          |             | NEO             | 4 (0.06)         | 6434                | 6438      |                      |      |
|          |             | PROSPER         | 4 (0.07)         | 5629                | 5633      |                      |      |
|          |             | Leiden 85-plus  | 0 (0.0)          | 539                 | 539       |                      |      |
|          | Sex (n)     | male            | 4 (0.06)         | 6353                | 6357      | .901                 |      |
|          |             | female          | 5 (0.07)         | 7306                | 7311      |                      |      |
|          |             | Age (mean±SE)   |                  | 67.9±1.79           | 64.2±0.11 | 64.2±0.11            | .396 |
|          |             | BMI (mean±SE)   |                  | 29.0±1.19           | 28.3±0.04 | 28.3±0.04            | .639 |
|          | Country (n) | The Netherlands | 5 (0.05)         | 9101                | 9106      | .320                 |      |
| Scotland |             | 1 (0.04)        | 2455             | 2456                |           |                      |      |
| Ireland  |             | 3 (0.14)        | 2103             | 2106                |           |                      |      |
| ATXN2    | Cohort (n)  | NESDA           | 0 (0.00)         | 930                 | 930       | .600                 |      |
|          |             | NESDO           | 0 (0.00)         | 128                 | 128       |                      |      |
|          |             | NEO             | 6 (0.09)         | 6383                | 6389      |                      |      |
|          |             | PROSPER         | 2 (0.04)         | 5546                | 5548      |                      |      |
|          |             | Leiden 85-plus  | 0 (0.00)         | 541                 | 541       |                      |      |
|          | Sex (n)     | male            | 6 (0.10)         | 6289                | 6295      | .106                 |      |
|          |             | female          | 2 (0.03)         | 7239                | 7241      |                      |      |
|          |             | Age (mean±SE)   |                  | 60.8±3.18           | 64.1±0.11 | 64.1±0.11            | .474 |
|          |             | BMI (mean±SE)   |                  | 27.2±1.61           | 28.3±0.04 | 28.3±0.04            | .550 |
|          | Country (n) | The Netherlands | 8 (0.09)         | 9034                | 9042      | .137                 |      |
| Scotland |             | 0 (0.00)        | 2419             | 2419                |           |                      |      |
| Ireland  |             | 0 (0.00)        | 2075             | 2075                |           |                      |      |
| ATXN3    | Cohort (n)  | NESDA           | 0 (0.00)         | 929                 | 929       | .704                 |      |
|          |             | NESDO           | 0 (0.00)         | 128                 | 128       |                      |      |
|          |             | NEO             | 2 (0.03)         | 6492                | 6494      |                      |      |
|          |             | PROSPER         | 0 (0.00)         | 5544                | 5544      |                      |      |
|          |             | Leiden 85-plus  | 0 (0.00)         | 450                 | 450       |                      |      |
|          | Sex (n)     | male            | 1 (0.02)         | 6320                | 6321      | .925                 |      |
|          |             | female          | 1 (0.01)         | 7223                | 7224      |                      |      |
|          |             | Age (mean±SE)   |                  | 57.5±3.50           | 63.9±0.11 | 63.9±0.11            | .488 |
|          |             | BMI (mean±SE)   |                  | 30.8±2.04           | 28.3±0.04 | 28.3±0.04            | .469 |
|          | Country (n) | The Netherlands | 2 (0.02)         | 9054                | 9056      | .992                 |      |
| Scotland |             | 0 (0.00)        | 2423             | 2423                |           |                      |      |
| Ireland  |             | 0 (0.00)        | 2066             | 2066                |           |                      |      |
| CACNA1A  | Cohort (n)  | NESDA           | 0 (0.00)         | 927                 | 927       | .890                 |      |
|          |             | NESDO           | 0 (0.00)         | 128                 | 128       |                      |      |
|          |             | NEO             | 1 (0.02)         | 6393                | 6394      |                      |      |
|          |             | PROSPER         | 0 (0.00)         | 5633                | 5633      |                      |      |
|          |             | Leiden 85-plus  | 0 (0.00)         | 533                 | 533       |                      |      |
|          | Sex (n)     | male            | 0 (0.00)         | 6327                | 6327      | .351                 |      |
|          |             | female          | 1 (0.01)         | 7287                | 7288      |                      |      |
|          |             | Age (mean±SE)   |                  | 52                  | 64.2±0.11 | 64.2                 | -    |
|          |             | BMI (mean±SE)   |                  | 23.0                | 28.3±0.04 | 28.3                 | -    |
|          | Country (n) | The Netherlands | 1 (0.01)         | 9050                | 9051      | .777                 |      |
| Scotland |             | 0 (0.00)        | 2457             | 2457                |           |                      |      |
| Ireland  |             | 0 (0.00)        | 2107             | 2107                |           |                      |      |

| PDAG     | Variable      | Pathological (%) | Normal <sup>a</sup> | Total     | P-value <sup>b</sup> |      |
|----------|---------------|------------------|---------------------|-----------|----------------------|------|
| TBP      | Cohort (n)    | NESDA            | 7 (0.75)            | 923       | 930                  | .631 |
|          |               | NESDO            | 1 (0.78)            | 127       | 128                  |      |
|          |               | NEO              | 62 (0.97)           | 6357      | 6418                 |      |
|          |               | PROSPER          | 66 (1.19)           | 5493      | 5559                 |      |
|          |               | Leiden 85-plus   | 7 (1.27)            | 543       | 550                  |      |
|          | Sex (n)       | male             | 61 (0.95)           | 5258      | 6319                 | .353 |
|          |               | female           | 82 (1.13)           | 7184      | 7266                 |      |
|          | Age (mean±SE) |                  | 65.4±1.08           | 64.1±0.11 | 64.1±0.11            | .254 |
|          | BMI (mean±SE) |                  | 27.7±0.38           | 28.3±0.04 | 28.3±0.04            | .177 |
|          | Country (n)   | The Netherlands  | 92 (1.01)           | 8987      | 9079                 | .037 |
| Scotland |               | 19 (0.78)        | 2409                | 2428      |                      |      |
| Ireland  |               | 32 (1.54)        | 2046                | 2078      |                      |      |
| HTT      | Cohort (n)    | NESDA            | 0 (0.00)            | 930       | 930                  | .501 |
|          |               | NESDO            | 0 (0.00)            | 128       | 128                  |      |
|          |               | NEO              | 12 (0.19)           | 6441      | 6453                 |      |
|          |               | PROSPER          | 7 (0.11)            | 5595      | 6502                 |      |
|          |               | Leiden 85-plus   | 0 (0.00)            | 557       | 557                  |      |
|          | Sex (n)       | male             | 13 (0.20)           | 6336      | 6349                 | .055 |
|          |               | female           | 6 (0.08)            | 7315      | 7321                 |      |
|          | Age (mean±SE) |                  | 64.8±2.17           | 64.2±0.11 | 64.2±0.11            | .833 |
|          | BMI (mean±SE) |                  | 27.2±0.96           | 28.3±0.04 | 28.3±0.04            | .331 |
|          | Country (n)   | The Netherlands  | 15 (0.16)           | 9118      | 9133                 | .527 |
| Scotland |               | 2 (0.08)         | 2444                | 2446      |                      |      |
| Ireland  |               | 2 (0.10)         | 2089                | 2091      |                      |      |
| AR ♂     | Cohort (n)    | NESDA            | 0 (0.00)            | 335       | 335                  | .899 |
|          |               | NESDO            | 0 (0.00)            | 49        | 49                   |      |
|          |               | NEO              | 1 (0.03)            | 3009      | 3010                 |      |
|          |               | PROSPER          | 0 (0.00)            | 2663      | 2663                 |      |
|          |               | Leiden 85-plus   | 0 (0.00)            | 179       | 179                  |      |
|          | Sex (n)       | male             | 1 (0.02)            | 6235      | 6236                 | -    |
|          |               | female           | -                   | -         | -                    |      |
|          | Age (mean±SE) |                  | 63                  | 64.3±0.16 | 64.3                 | -    |
|          | BMI (mean±SE) |                  | 21.2                | 28.1±0.05 | 28.1                 | -    |
|          | Country (n)   | The Netherlands  | 1 (0.02)            | 4122      | 4123                 | .774 |
| Scotland |               | 0 (0.00)         | 1190                | 1190      |                      |      |
| Ireland  |               | 0 (0.00)         | 923                 | 923       |                      |      |

PDAG=polyglutamine disease associated gene. NESDA=the Netherlands Study of Depression and Anxiety. NESDO=the Netherlands Study of Depression in Older Persons. NEO=the Netherlands Epidemiology of Obesity. PROSPER=the Prospective Study of Pravastatin in the Elderly at Risk. BMI=body mass index. <sup>a</sup>) including the intermediate and normal range. <sup>b</sup>) determined by an independent sample t-test given a continuous variable or a chi-square test given a categorical variable.

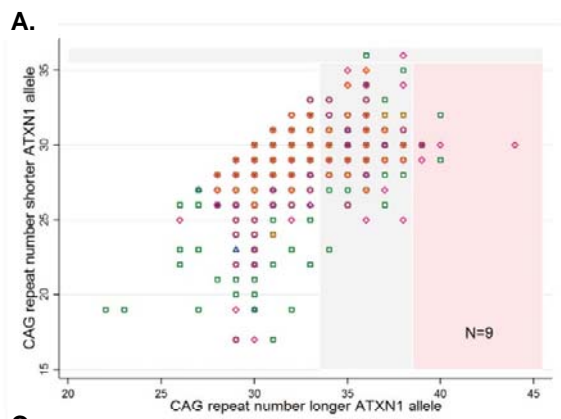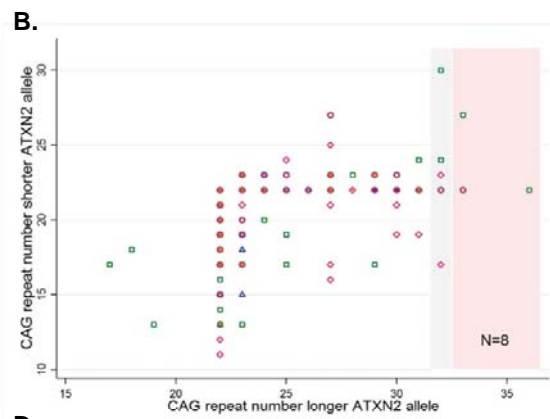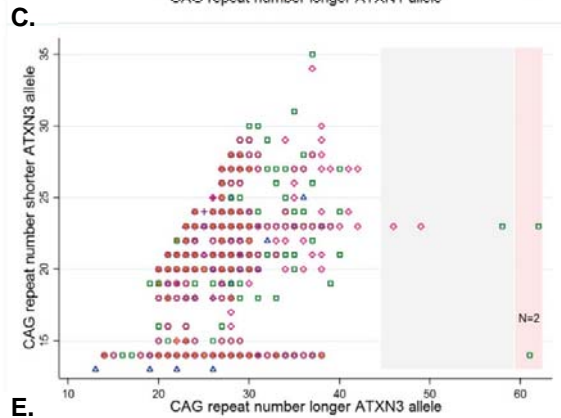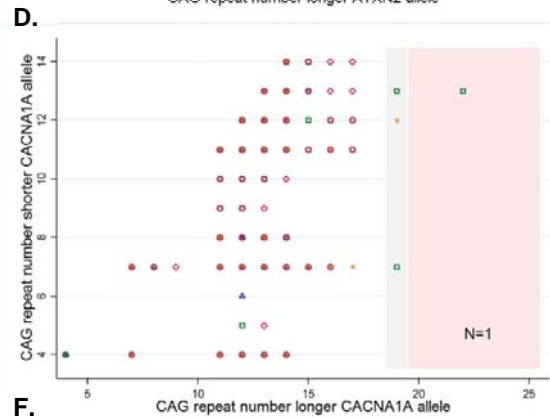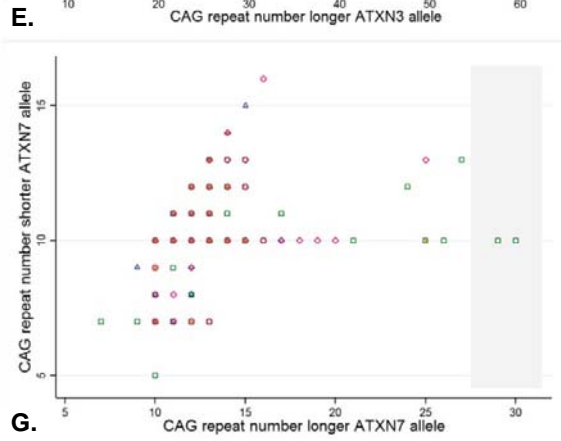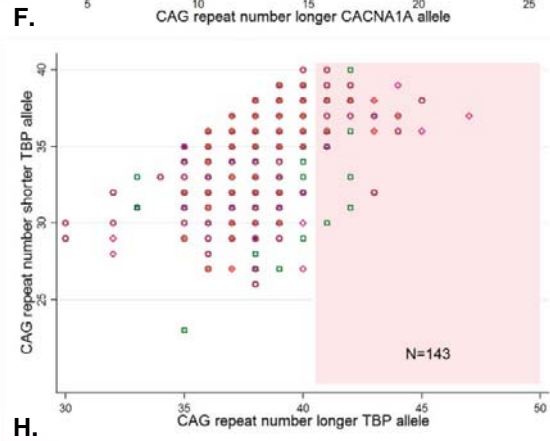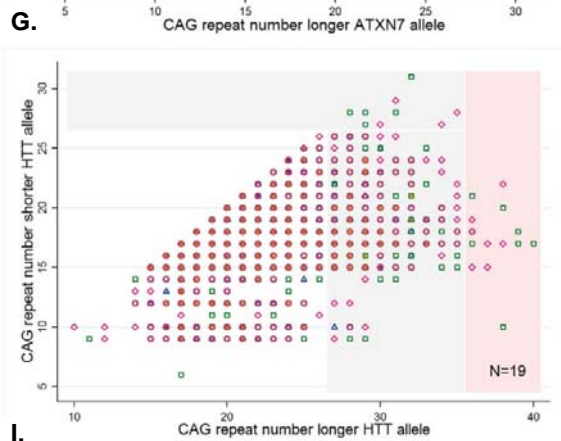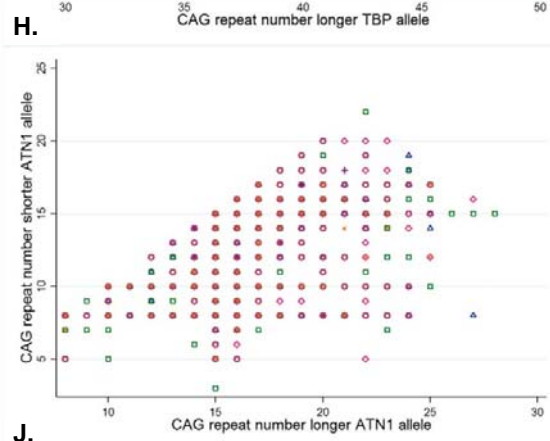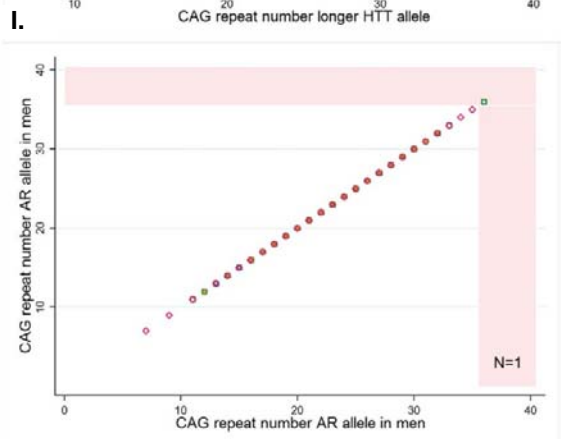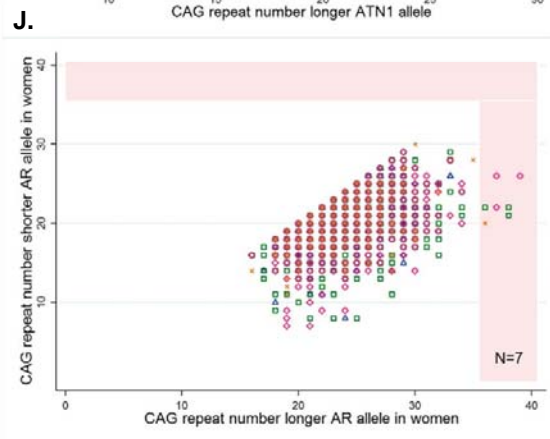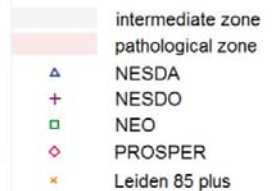



**eFigure. The distribution of the CAG repeat numbers in the polyglutamine disease-associated genes per allele and cohort.** On the x-axis are the CAG repeat numbers in the longer allele and on the y-axis are the CAG repeat numbers of the shorter allele. Since the alleles are defined as 'shorter' or 'longer' relative to the size of the other allele, the shorter allele cannot be longer than the longer allele. The *AR* gene is linked to the X-chromosome. Therefore, men only have one *AR* allele.
